# Supplementary material for: One-dimension TiO2 nanostructures: oriented attachment and application in dye-sensitized solar cell
Source: Royal Society of Chemistry journal article supplement (doi:10.1039/c3ce41867g), 2013-11-20
Supplement: c3ce41867g.pdf [file c3ce41867g.pdf]

## Electronic Supporting Information:

### One-dimension $\text{TiO}_2$ Nanostructures: Oriented Attachment and Application in Dye-sensitized Solar Cell

Chao Chen, Jia Wang, Zhimin Ren, Guodong Qian and Zhiyu Wang\*

State Key Laboratory of Silicon Materials, Department of Materials Science & Engineering, Zhejiang University, Hangzhou, 310027, P.R. China.

E-mail: [wangzhiyu@zju.edu.cn](mailto:wangzhiyu@zju.edu.cn)

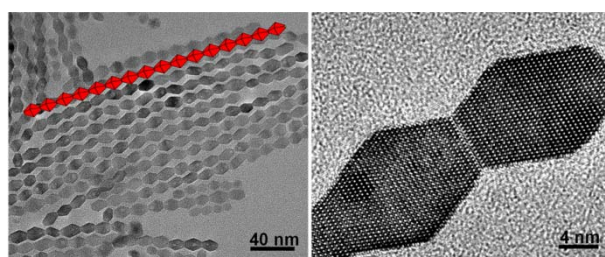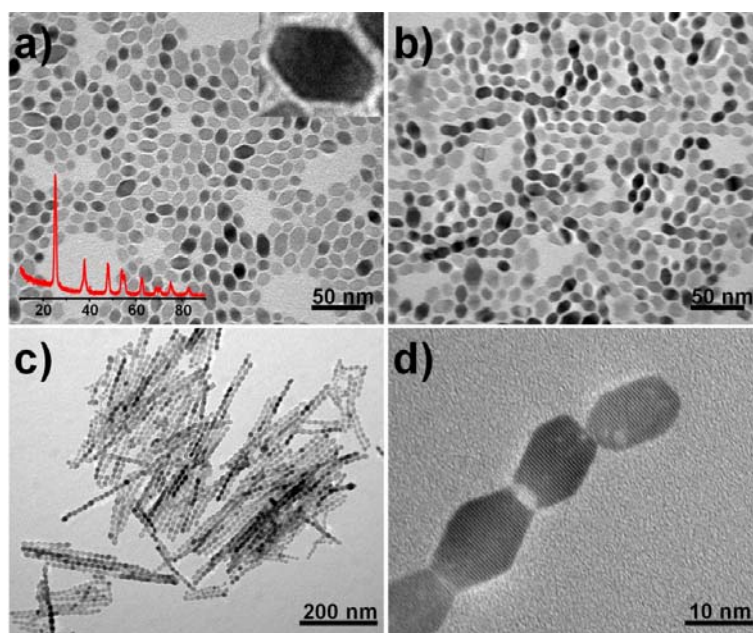

**Figure S1.** TEM images illustrating the shape evolution process of nanochains in the second step of synthesis. a) Anatase primary nanoparticles obtained at the end of first step; b) after 3 hours synthesis in the second step; c) after 8 hours synthesis at the second step. d) HRTEM image shows that the crystal planes were not entirely fused.

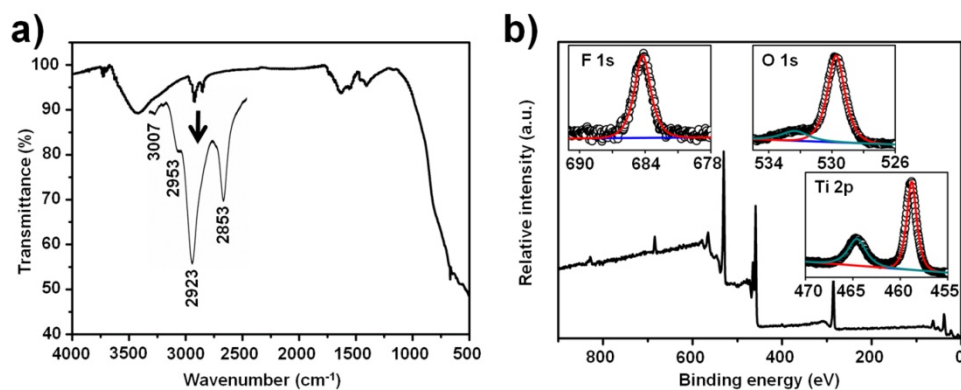

**Figure S2.** Characterization of the surface adsorbed species of primary nanoparticles: a) FTIR spectrum; b) XPS spectrum.

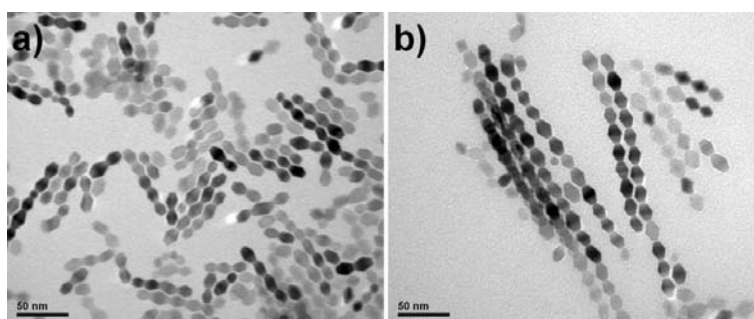

**Figure S3.** TEM images of the sample prepared by the addition of other hydroxyl group donors: a) ethanol,  $\text{CH}_3\text{CH}_2\text{OH}$ ; b) n-propanol,  $\text{CH}_3\text{H}_7\text{OH}$ .

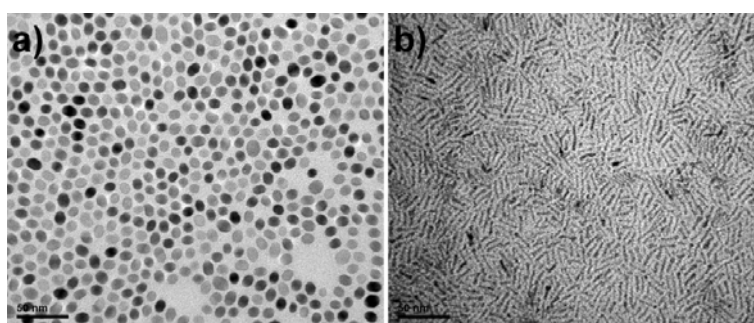

**Figure S4.** TEM images: a) Quasi-spherical nanoparticles and b) nanorods. These nanocrystal were used as primary nanoparticles for investigating the influence of morphologies on oriented attachment.

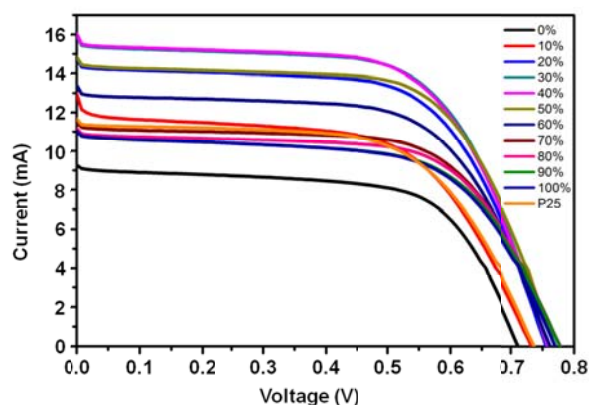

**Figure S5.** Current density-Voltage characteristics of the fabricated DSSCs under AM 1.5 conditions.

| Nanochains (wt %) | Jsc (mAcm <sup>-2</sup> ) | Voc (V)  | FF        | η (%)  |
|-------------------|---------------------------|----------|-----------|--------|
| 0%                | 9.273456                  | 0.711318 | 60.71075  | 4.2026 |
| 10%               | 12.953788                 | 0.732476 | 60.218556 | 5.2393 |
| 20%               | 14.79588                  | 0.755857 | 61.96475  | 6.9299 |
| 30%               | 15.95188                  | 0.758125 | 61.725054 | 7.4647 |
| 40%               | 16.037988                 | 0.759018 | 60.908757 | 7.4145 |
| 50%               | 14.841776                 | 0.769727 | 62.830822 | 7.1779 |
| 60%               | 13.406848                 | 0.762083 | 61.265374 | 6.2596 |
| 70%               | 11.500724                 | 0.770313 | 63.359008 | 5.6131 |
| 80%               | 11.176992                 | 0.778257 | 62.920617 | 5.4232 |
| 90%               | 11.019052                 | 0.777437 | 61.320767 | 5.2531 |
| 100%              | 11.023632                 | 0.770466 | 61.337296 | 5.2096 |
| P25               | 11.672640                 | 0.736808 | 60.452539 | 5.1992 |

**Table S1.** Efficiency parameters measured for the DSSCs with different mass percentages of nanochains in photoanode.

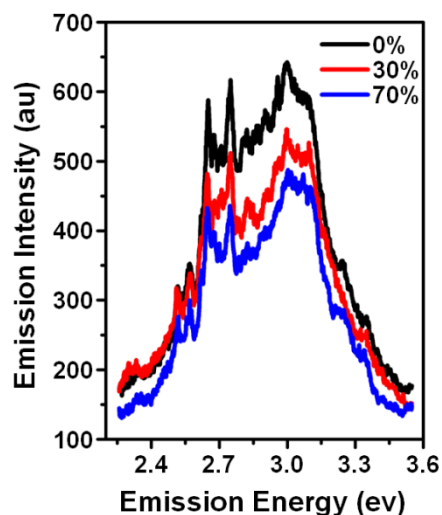

Figure S6. PL emission spectra ( $\lambda_{\text{ex}}=310$  nm, 4.0eV) of TiO<sub>2</sub> films with a series of nanochain content. Emissions with maxima in the range of 3.0-3.2eV have been attributed to the band-edge transitions of the anatase crystallite. The emissions in range of 2.5-2.8eV are generally associated with surface defect sites.

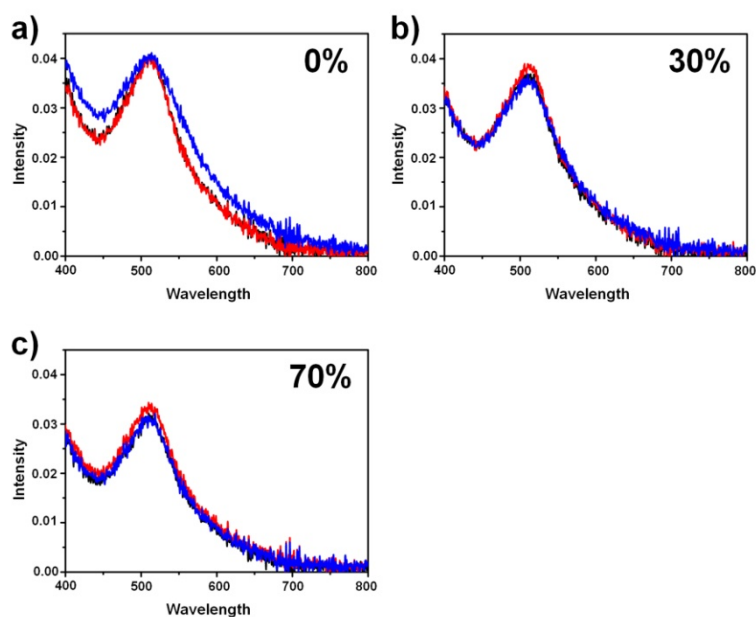

Figure S7. Absorption spectra of N719 in NaOH solutions for TiO<sub>2</sub> films with a series of nanochain contents: a) 0%; b) 30%; c) 70%. For each content three films were prepared and tested. The dye adsorption amount was calculated to be  $11.42 \times 10^{-8}$  mol/cm<sup>2</sup>;  $10.61 \times 10^{-8}$  mol/cm<sup>2</sup>;  $9.21 \times 10^{-8}$  mol/cm<sup>2</sup> respectively.
